# Supplementary material for: Knowledge of Diabetes among Adults at High Risk for Type 2 Diabetes in Kerala, India
Source: Preprints.org preprint supplement (doi:10.20944/preprints202211.0469.v1), 2022-11-25
Supplement: Supplementary file 1 [file supplementary]

## Supplementary file

Table S1: Diabetes knowledge scale.

| No. | Questions                                                                                                                                                                                                                                                                                                                                                                                                    |
|-----|--------------------------------------------------------------------------------------------------------------------------------------------------------------------------------------------------------------------------------------------------------------------------------------------------------------------------------------------------------------------------------------------------------------|
| 1   | Have you heard of the term diabetes? Yes/No                                                                                                                                                                                                                                                                                                                                                                  |
| 2   | If yes, do you know what diabetes is? Yes/No                                                                                                                                                                                                                                                                                                                                                                 |
| 3   | Do you think in general, more and more people are getting affected with diabetes nowadays? Yes/No/Don't know                                                                                                                                                                                                                                                                                                 |
| 4   | Do you think diabetes can affect other organs? Yes/No/Don't know                                                                                                                                                                                                                                                                                                                                             |
| 5   | What are the factors you think that contribute to diabetes? (please circle as many as appropriate) <ul style="list-style-type: none"> <li>a. Obesity</li> <li>b. Decreased physical activity</li> <li>c. Family history of diabetes</li> <li>d. Mental stress</li> <li>e. Unhealthy diet</li> <li>f. Tobacco use</li> <li>g. Alcohol use</li> <li>h. Others (specify).....</li> <li>i. Don't know</li> </ul> |
| 6   | Do you know that diabetes can cause complications in organs? Yes/No/Don't know                                                                                                                                                                                                                                                                                                                               |
| 7   | If yes, which organs are they? <ul style="list-style-type: none"> <li>a. ....</li> <li>b. ....</li> <li>c. ....</li> <li>d. ....</li> </ul>                                                                                                                                                                                                                                                                  |
| 8   | Can diabetes be prevented? Yes/No/Don't know                                                                                                                                                                                                                                                                                                                                                                 |
